# Supplementary material
Source: publisher site journal article supplement (https://www.dovepress.com/article/549115)
Supplement: Supplementary file 1 [file 549115%20Supplementary%20Materials.docx]

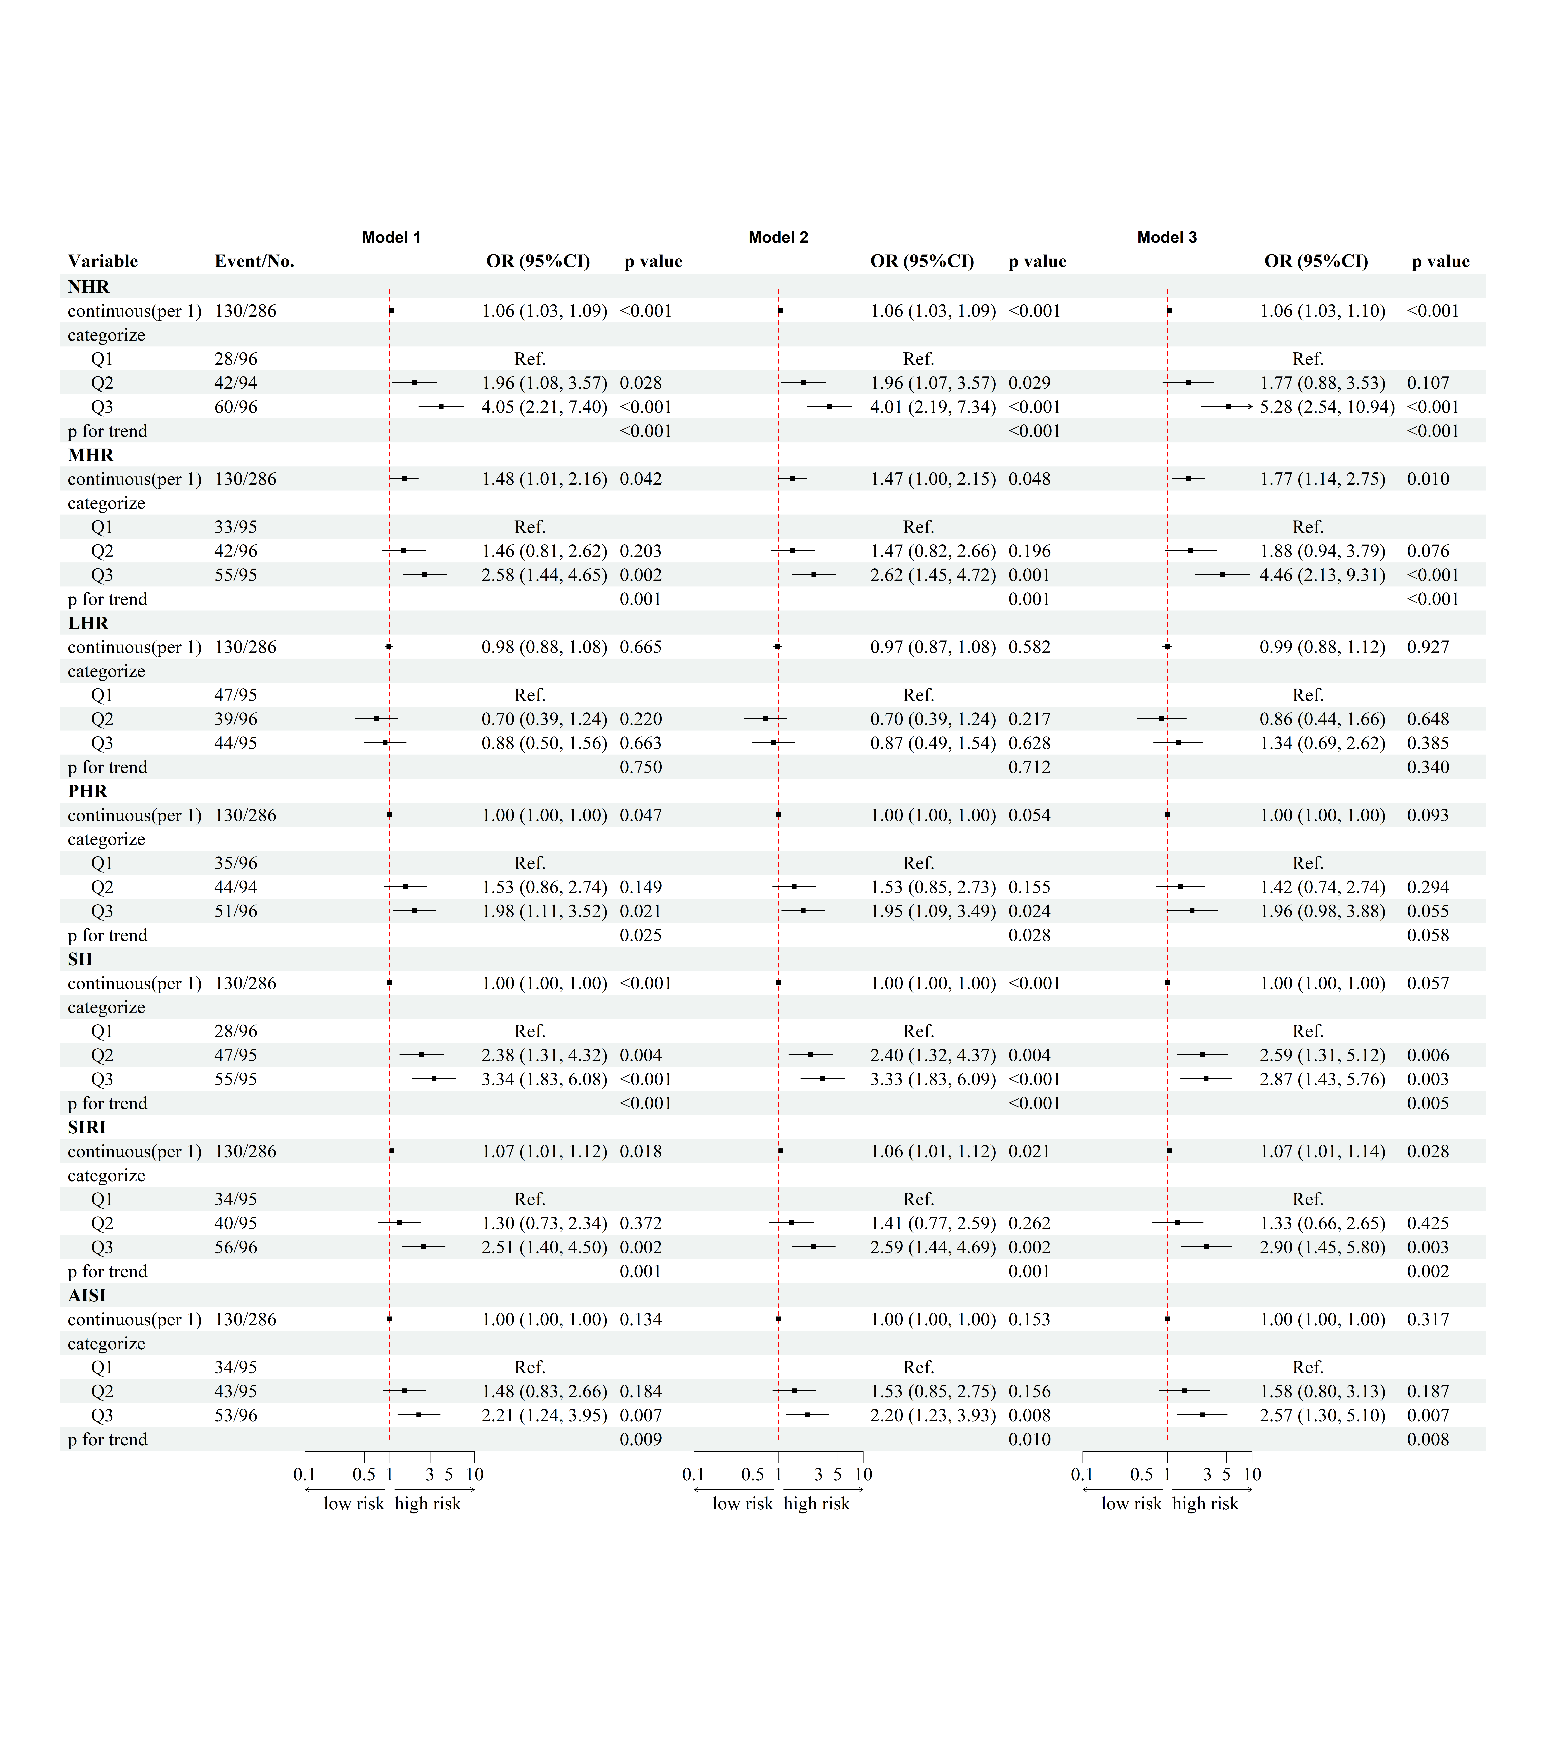


**Figure S1** Forest plot of inflammatory ratios for comparing MSAP vs. MAP patients. The blocks in the figure represent continuous variables (for each 1-unit increase) or the odds ratio (OR) values of the interquartile range (Q3 - Q1) in the multivariate logistic regression model. The horizontal lines represent the 95% confidence interval (CI). Here: Model 1 (unadjusted), Model 2 (adjusted for age and gender), Model 3 (adjusted for age, gender, alcohol consumption, smoking, hypertension, diabetes, triglycerides (TG), hematocrit (HCT), blood urea nitrogen (BUN), blood calcium (Ca²⁺), serum albumin (ALB), and medication status).

**
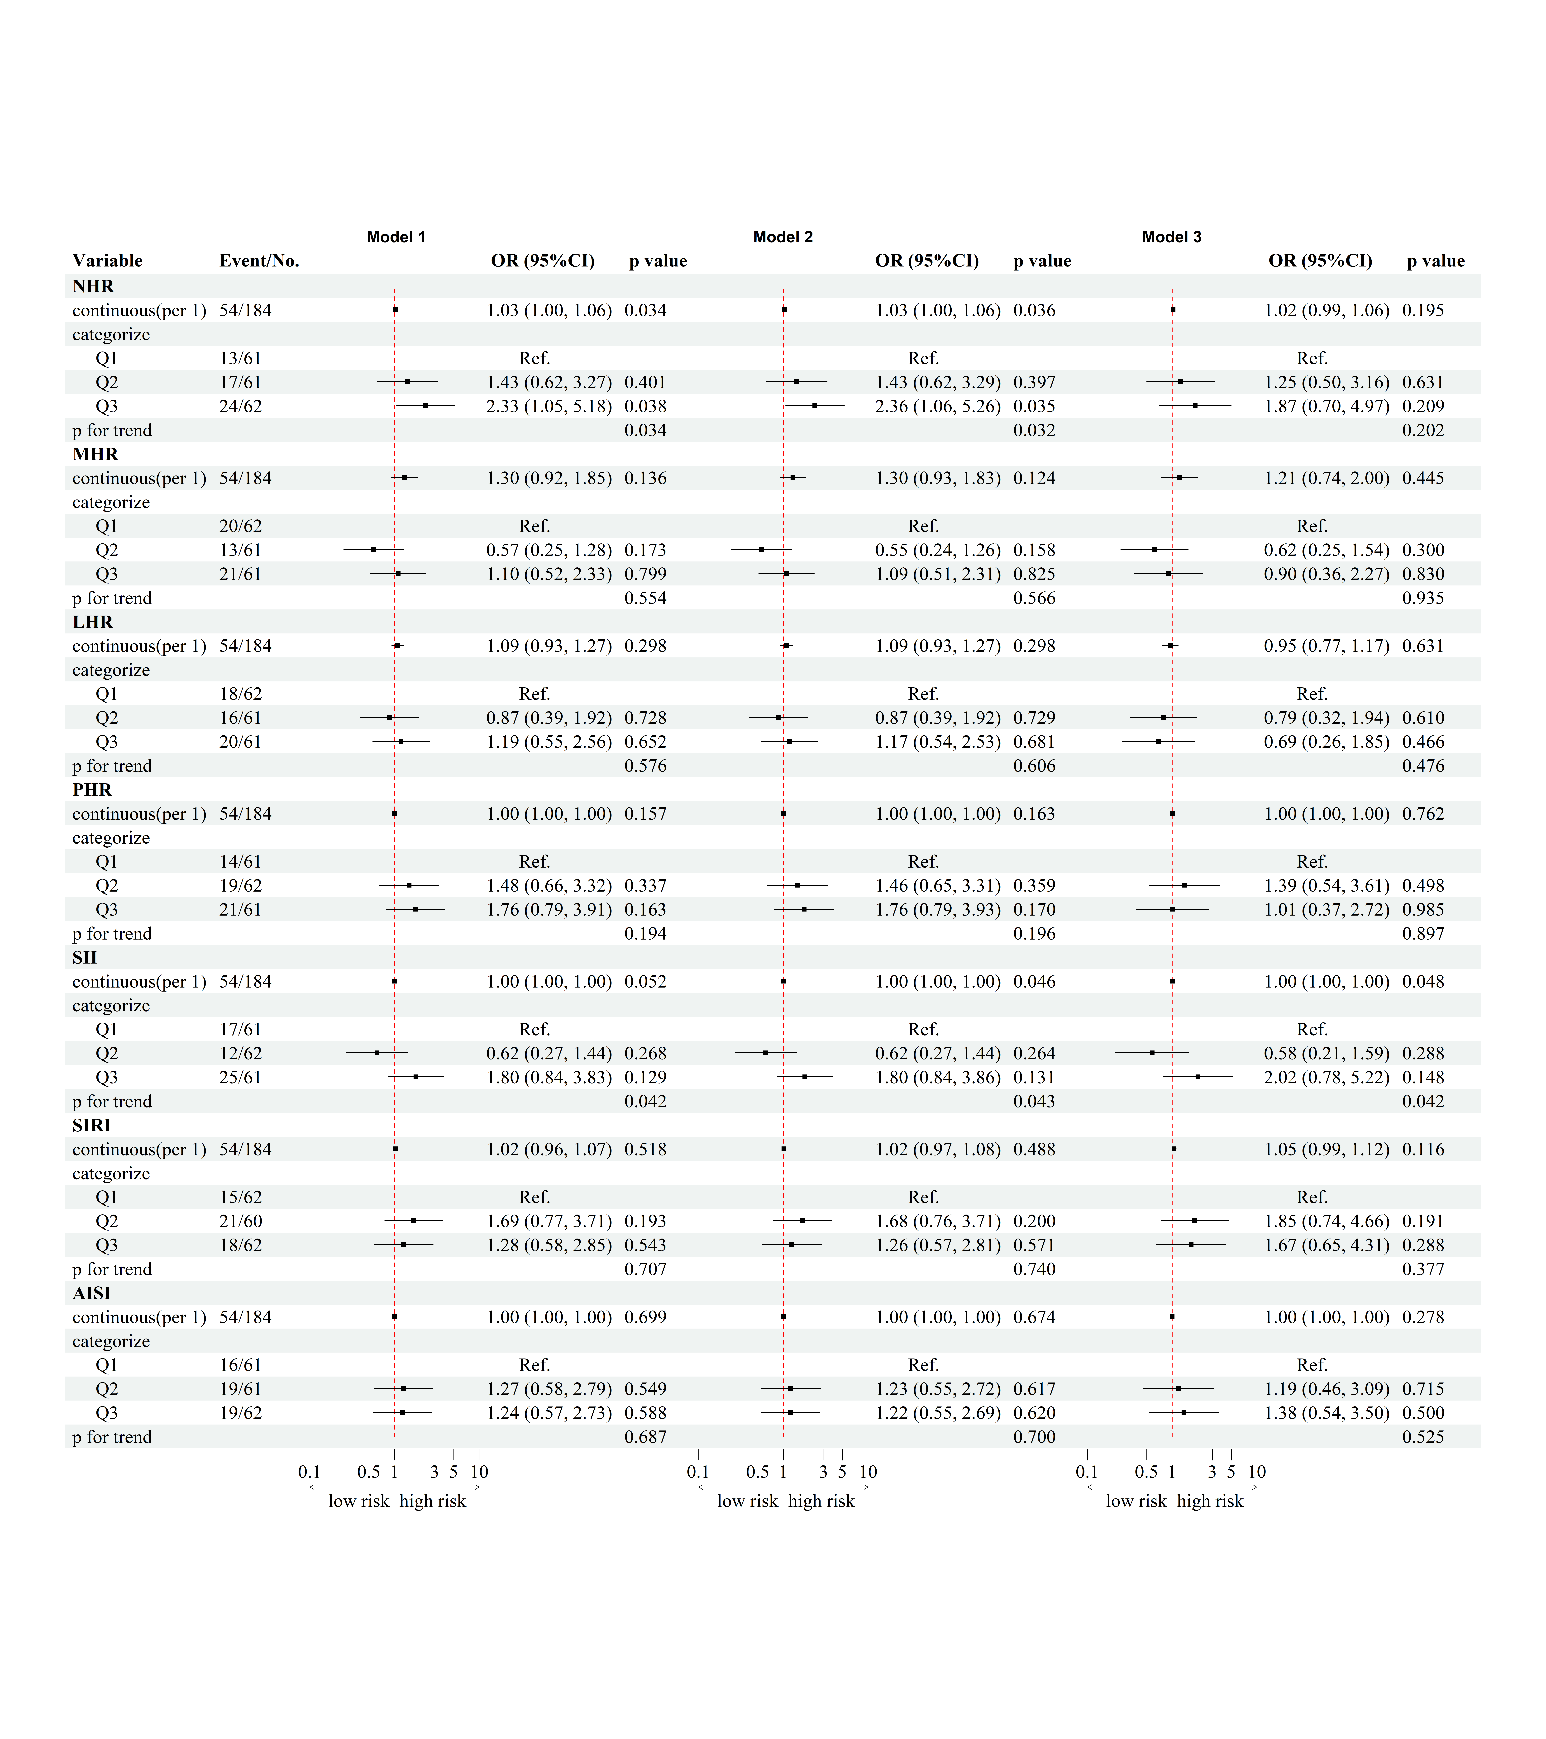
**

**Figure S2** Forest plot of inflammatory ratios for comparing SAP vs. MSAP patients.

The blocks in the figure represent continuous variables (for each 1-unit increase) or the odds ratio (OR) values of the interquartile range (Q3 - Q1) in the multivariate logistic regression model. The horizontal lines represent the 95% confidence interval (CI). Here: Model 1 (unadjusted), Model 2 (adjusted for age and gender), Model 3 (adjusted for age, gender, alcohol consumption, smoking, hypertension, diabetes, triglycerides (TG), hematocrit (HCT), blood urea nitrogen (BUN), blood calcium (Ca²⁺), serum albumin (ALB), and medication status).


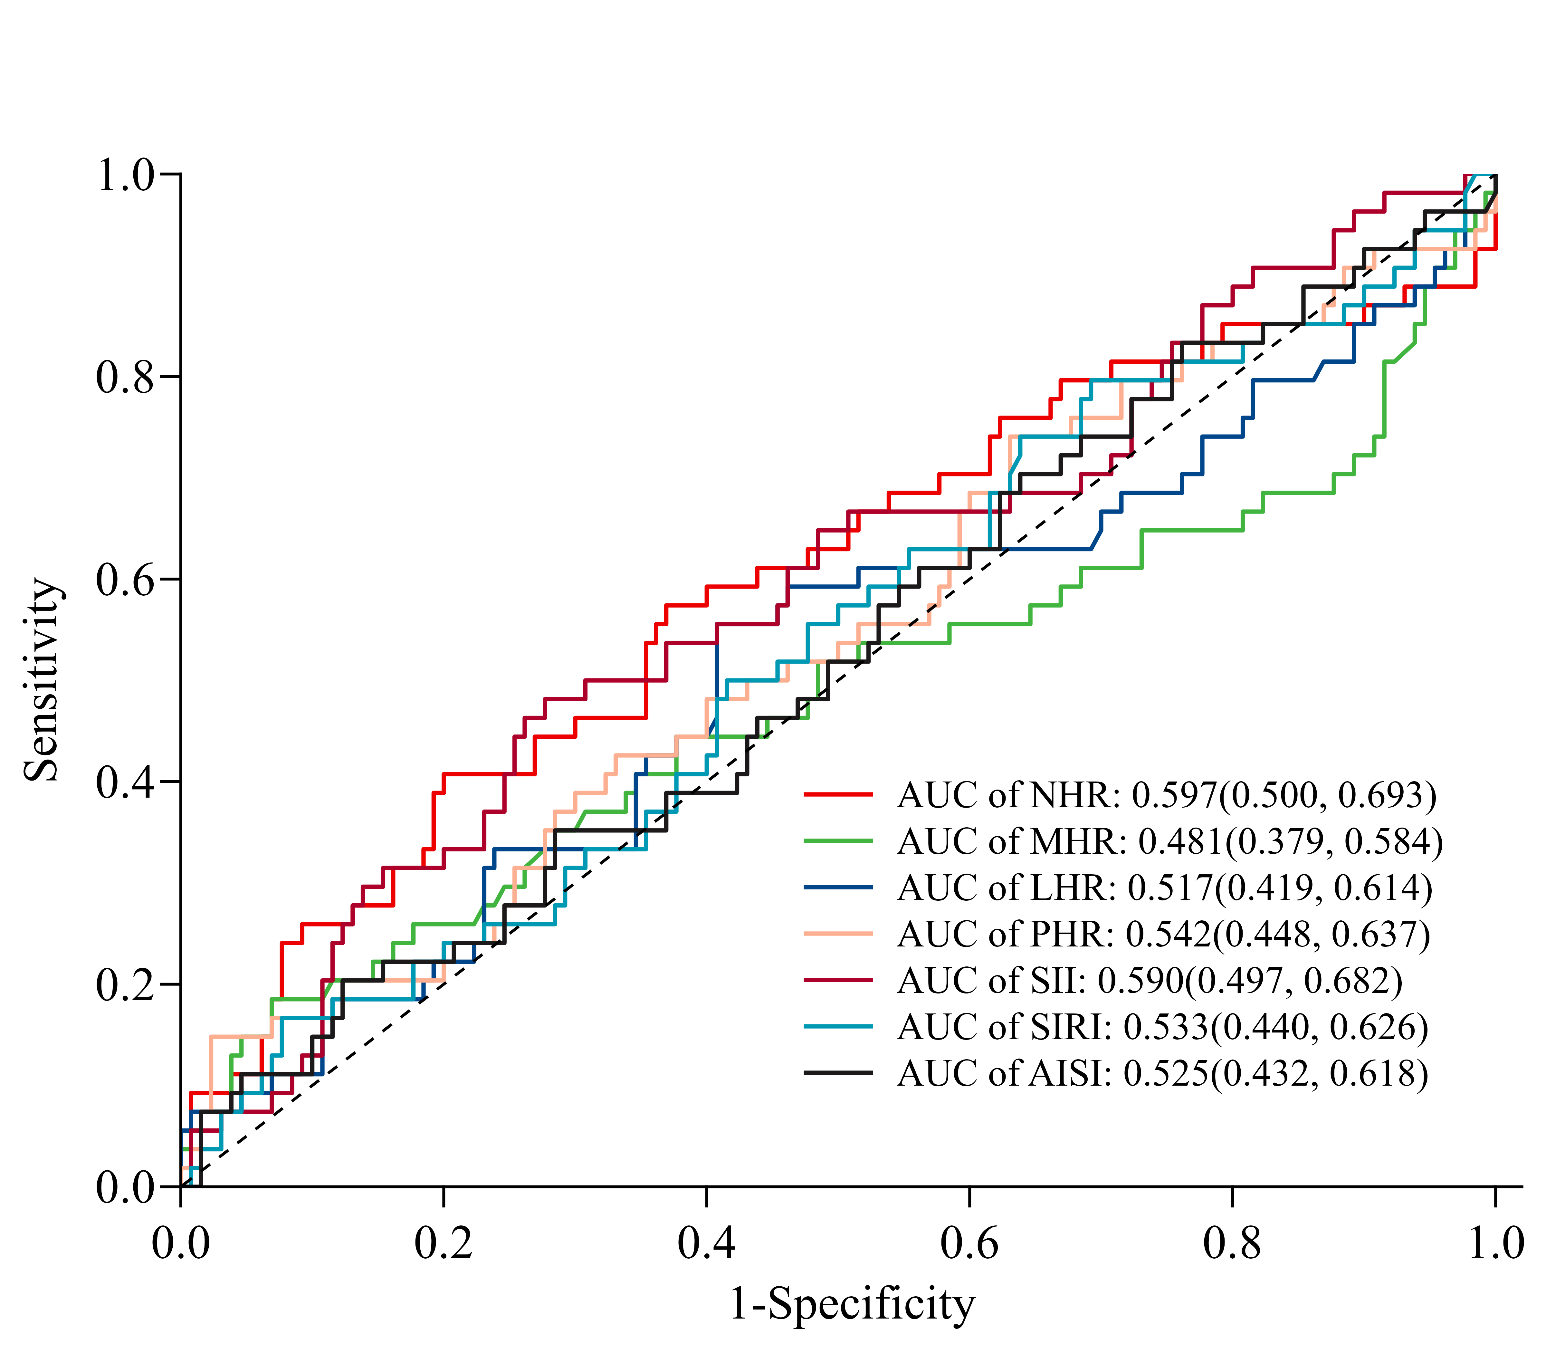


**Figure S3.**Receiver Operating Characteristic (ROC) curves of selected biomarkers for distinguishing SAP from MSAP patients. Abbreviations: NHR, neutrophil-to-HDL cholesterol ratio; MHR, monocyte-to-HDL cholesterol ratio; LHR, lymphocyte-to-HDL cholesterol ratio; PHR, platelet-to-HDL cholesterol ratio. SIRI, systemic inflammation response index; SII, systemic inflammatory response Index; AISI, aggregate index of systemic inflammation


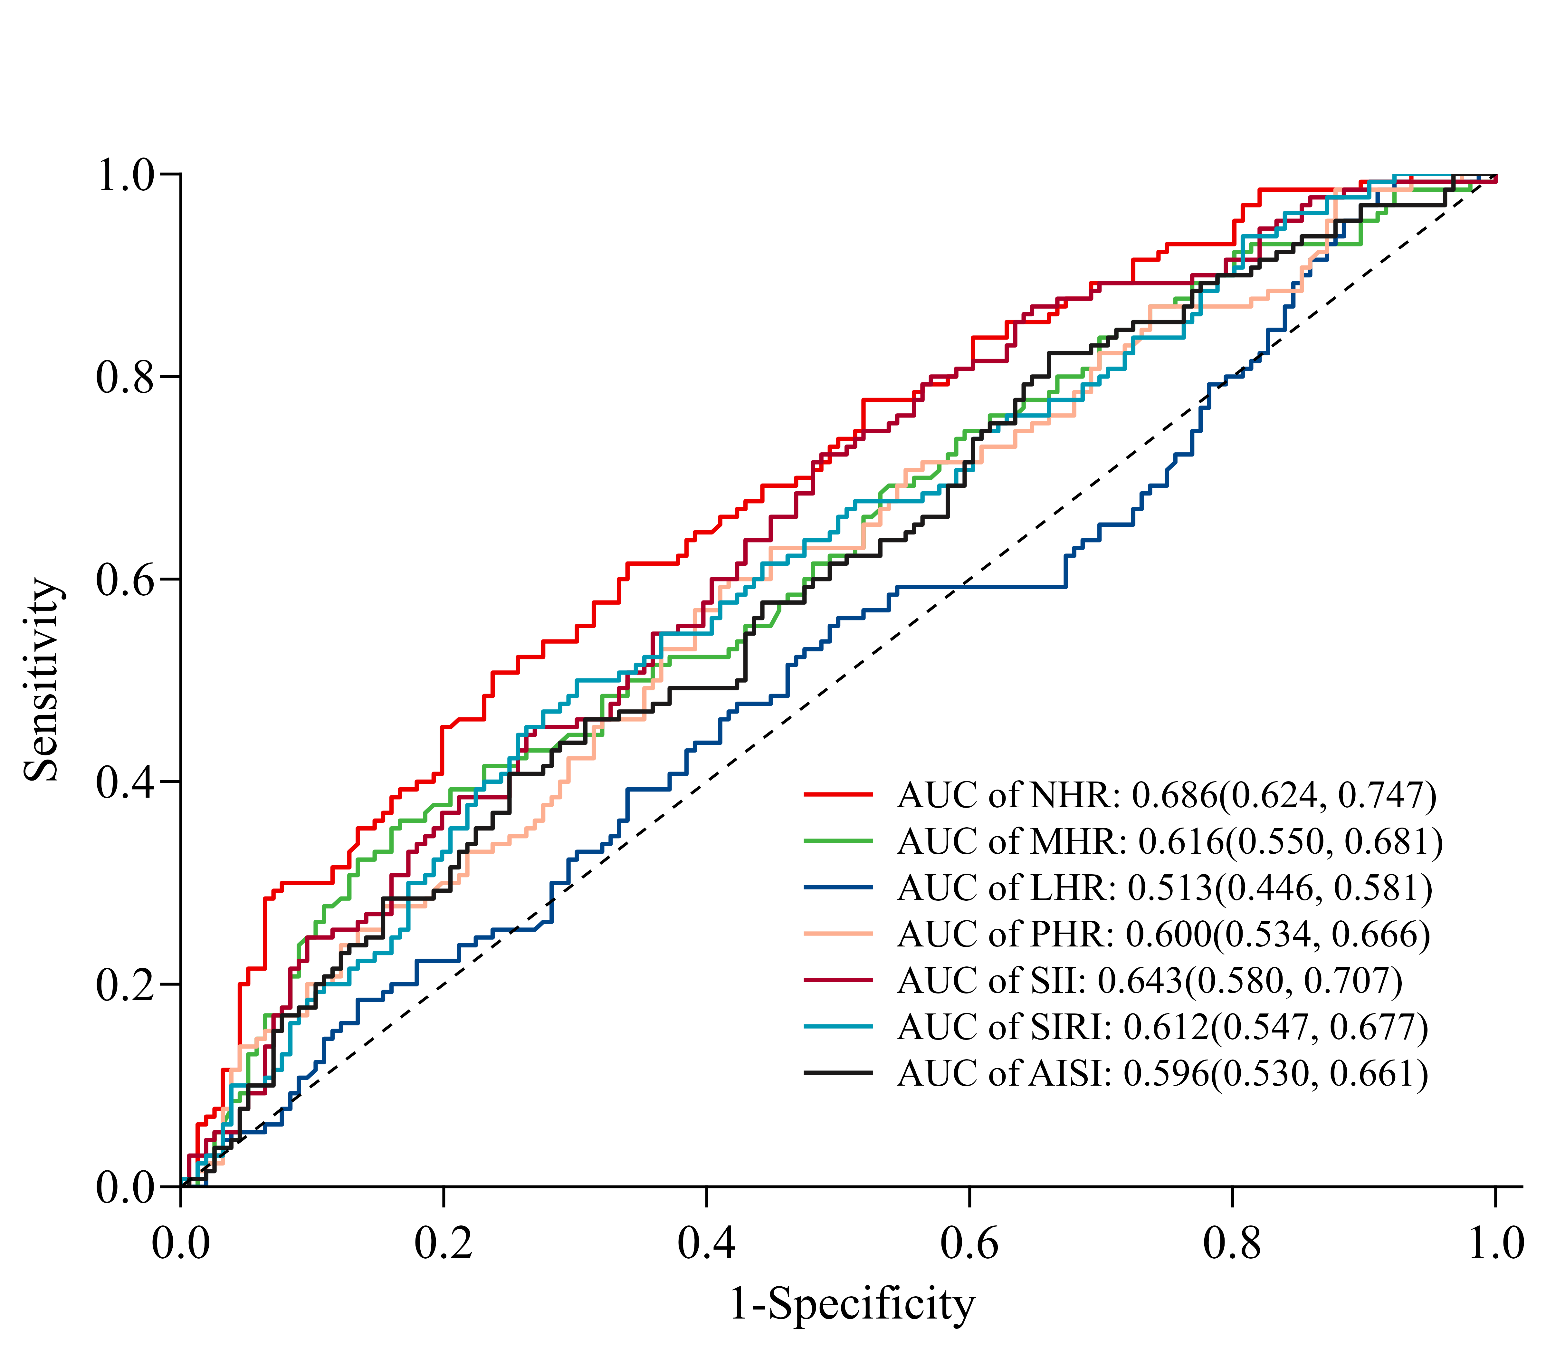


**Figure S4**. Receiver Operating Characteristic (ROC) curves of selected biomarkers for distinguishing MSAP from MAP patients. Abbreviations: NHR, neutrophil-to-HDL cholesterol ratio; MHR, monocyte-to-HDL cholesterol ratio; LHR, lymphocyte-to-HDL cholesterol ratio; PHR, platelet-to-HDL cholesterol ratio. SIRI, systemic inflammation response index; SII, systemic inflammatory response Index; AISI, aggregate index of systemic inflammation

**Table S1** Predictive Performance of Novel Inflammatory Markers for Severe Acute Pancreatitis (SAP vs. MSAP)

| Marker | cutoff | AUC | *P* value | Sensitivity | Specificity | Accuracy | PPV | NPV | Youden's Index |
| --- | --- | --- | --- | --- | --- | --- | --- | --- | --- |
| NHR | 23.129 | 0.597(0.500- 0.693) | 0.019 | 0.407(0.276- 0.538) | 0.800(0.731- 0.869) | 0.685(0.682- 0.687) | 0.458(0.317- 0.599) | 0.765(0.693- 0.836) | 0.207 |
| MHR | 0.398 | 0.481(0.379- 0.584) | 0.346 | 0.931(0.887- 0.974) | 0.185(0.082- 0.289) | 0.712(0.710- 0.714) | 0.733(0.666- 0.801) | 0.526(0.302- 0.751) | 0.116 |
| LHR | 1.683 | 0.517(0.419- 0.614) | 0.640 | 0.592(0.508- 0.677) | 0.556(0.423- 0.688) | 0.582(0.579- 0.584) | 0.762(0.679- 0.845) | 0.361(0.258- 0.465) | 0.148 |
| PHR | 796.875 | 0.542(0.448- 0.637) | 0.818 | 0.148(0.053- 0.243) | 0.977(0.951- 1.000) | 0.734(0.732- 0.736) | 0.727(0.464- 0.990) | 0.734(0.668- 0.800) | 0.125 |
| SII | 2372.844 | 0.590(0.497- 0.682) | 0.972 | 0.481(0.348- 0.615) | 0.723(0.646- 0.800) | 0.652(0.650- 0.655) | 0.419(0.297- 0.542) | 0.770(0.696- 0.845) | 0.204 |
| SIRI | 3.173 | 0.533(0.440- 0.626) | 0.757 | 0.796(0.689- 0.904) | 0.308(0.228- 0.387) | 0.451(0.448- 0.454) | 0.323(0.244- 0.403) | 0.784(0.671- 0.897) | 0.104 |
| AISI | 2834.093 | 0.525(0.432- 0.618) | 0.701 | 0.204(0.096- 0.311) | 0.877(0.820- 0.933) | 0.679(0.677- 0.682) | 0.407(0.222- 0.593) | 0.726(0.656- 0.796) | 0.081 |

Abbreviations: PPV- Positive Predictive Value; NPV- Negative Predictive Value.

**Table S2** Predictive Performance of Novel Inflammatory Markers for Severe Acute Pancreatitis (MSAP vs. MAP)

| Marker | cutoff | AUC | *P* value | Sensitivity | Specificity | Accuracy | PPV | NPV | Youden's Index |
| --- | --- | --- | --- | --- | --- | --- | --- | --- | --- |
| NHR | 12.146 | 0.686(0.624- 0.747) | <0.001 | 0.615(0.532- 0.699) | 0.660(0.586- 0.735) | 0.640(0.638- 0.641) | 0.602(0.518- 0.685) | 0.673(0.599- 0.748) | 0.275 |
| MHR | 1.103 | 0.616(0.550- 0.681) | <0.001 | 0.362(0.279- 0.444) | 0.833(0.775- 0.892) | 0.619(0.617- 0.620) | 0.644(0.534- 0.754) | 0.610(0.545- 0.676) | 0.195 |
| LHR | 0.615 | 0.513(0.446- 0.581) | 0.652 | 0.985(0.963- 1.000) | 0.090(0.045- 0.135) | 0.497(0.495- 0.498) | 0.474(0.415- 0.534) | 0.875(0.713- 1.037) | 0.075 |
| PHR | 277.958 | 0.600(0.534- 0.666) | 0.002 | 0.600(0.516- 0.684) | 0.583(0.506- 0.661) | 0.591(0.589- 0.593) | 0.545(0.464- 0.627) | 0.636(0.558- 0.715) | 0.183 |
| SII | 1381.787 | 0.643(0.580- 0.707) | <0.001 | 0.723(0.646- 0.800) | 0.513(0.434- 0.591) | 0.608(0.607- 0.610) | 0.553(0.478- 0.628) | 0.690(0.605- 0.774) | 0.236 |
| SIRI | 5.052 | 0.612(0.547- 0.677) | 0.001 | 0.500(0.414- 0.586) | 0.699(0.627- 0.771) | 0.608(0.607- 0.610) | 0.580(0.489- 0.672) | 0.626(0.555- 0.698) | 0.199 |
| AISI | 534.821 | 0.596(0.530- 0.661) | 0.003 | 0.823(0.757- 0.889) | 0.340(0.265- 0.414) | 0.559(0.558- 0.561) | 0.510(0.442- 0.577) | 0.697(0.594- 0.801) | 0.163 |

Abbreviations: PPV- Positive Predictive Value; NPV- Negative Predictive Value.
